# Supplementary material for: Less active CeO2regulating bifunctional oxygen electrocatalytic activity of Co3O4@N-doped carbon for Zn–air batteries
Source: Royal Society of Chemistry journal article supplement (doi:10.1039/c9ta00302a), 2019-01-01
Supplement: c9ta00302a1.pdf [file c9ta00302a1.pdf]

## SUPPORTING INFORMATION

### Less Active CeO<sub>2</sub> regulating Bifunctional Oxygen Electrocatalytic Activity of Co<sub>3</sub>O<sub>4</sub>@N-doped Carbon for Zn-air Battery

Xiaobo He<sup>1, 3</sup>†, Xuerui Yi<sup>2</sup>†, Fengxiang Yin<sup>1, 3</sup>\*, Biaohua Chen<sup>1</sup>, Guoru Li<sup>1</sup>, Huaqiang Yin<sup>4</sup>

<sup>1</sup> Jiangsu Key Laboratory of Advanced Catalytic Materials and Technology, School of Petrochemical Engineering, Changzhou University, Changzhou 213164, China

<sup>2</sup> College of Chemical Engineering, Beijing University of Chemical Technology, Beijing 100029, PR China

<sup>3</sup> Changzhou Institute of Advanced Materials, Beijing University of Chemical Technology, Changzhou 213164, PR China

<sup>4</sup> Key Laboratory of Advanced Reactor Engineering and Safety, Ministry of Education, Tsinghua University, Beijing 100084, PR China

\*Corresponding author

Tel.: +86-519-86330253

E-mail: yinfx@cczu.edu.cn (F. Yin)

† These authors contributed equally.

## RHE conversion

We have calibrated the reference electrode to RHE by the method presented in Y.Y. Liang, et al. (Nature Mater. 2011, 10, 780-786.). The calibration was conducted in a H<sub>2</sub>-saturated 0.1 M KOH electrolyte with a Pt wire as the working electrode. The CV was run at a sweep rate of 1 mV s<sup>-1</sup> and the average of two potentials at which current crossed zero was regarded as the thermodynamic potential of hydrogen electrode reaction.

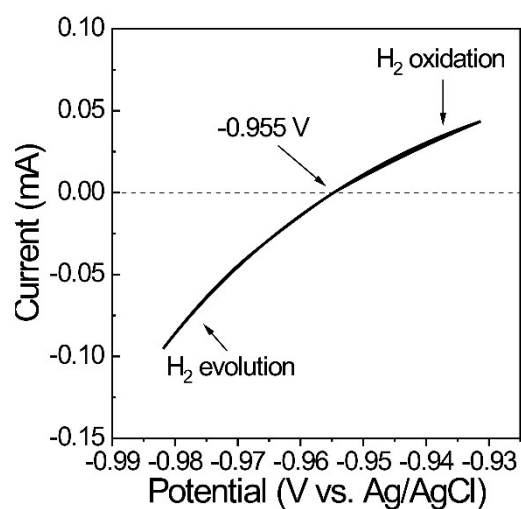

In this study, the potentials measured have been calibrated by the following equation:

$$E_{(\text{RHE})} = E_{(\text{Ag}/\text{AgCl})} + 0.955 \text{ V}.$$

## Supplementary Figures and Notes

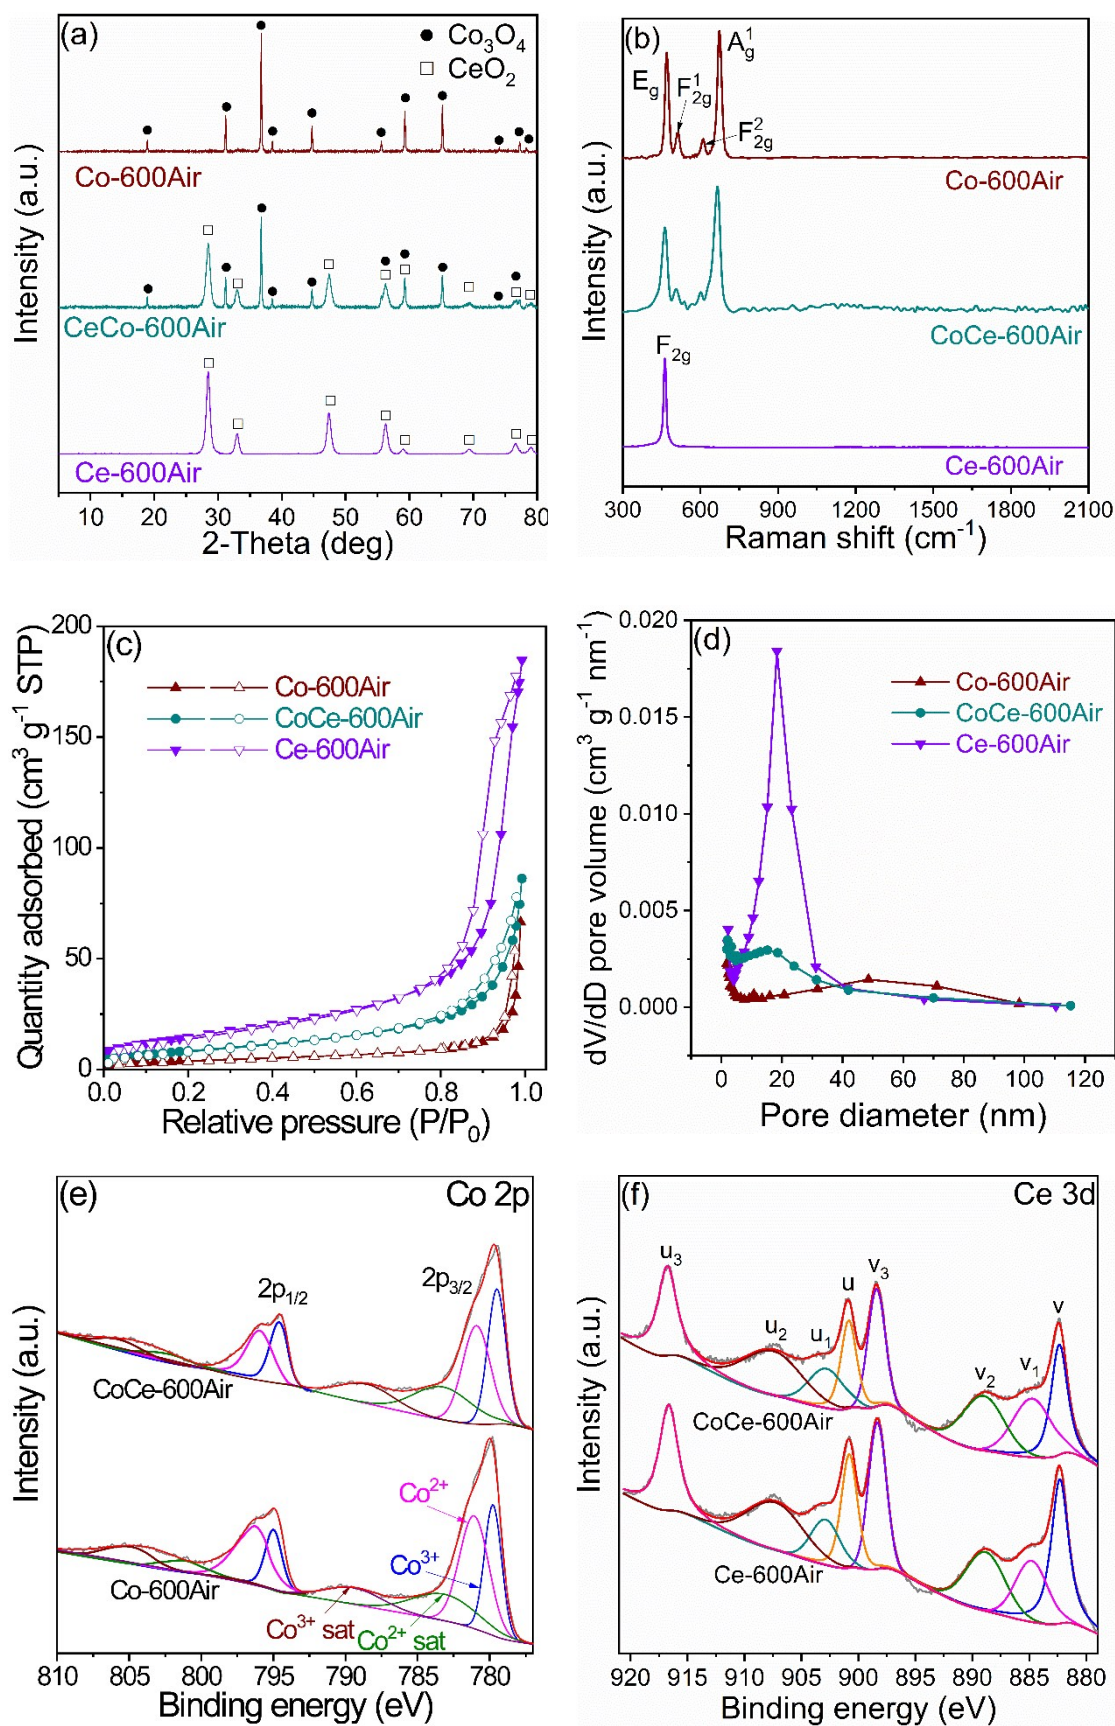

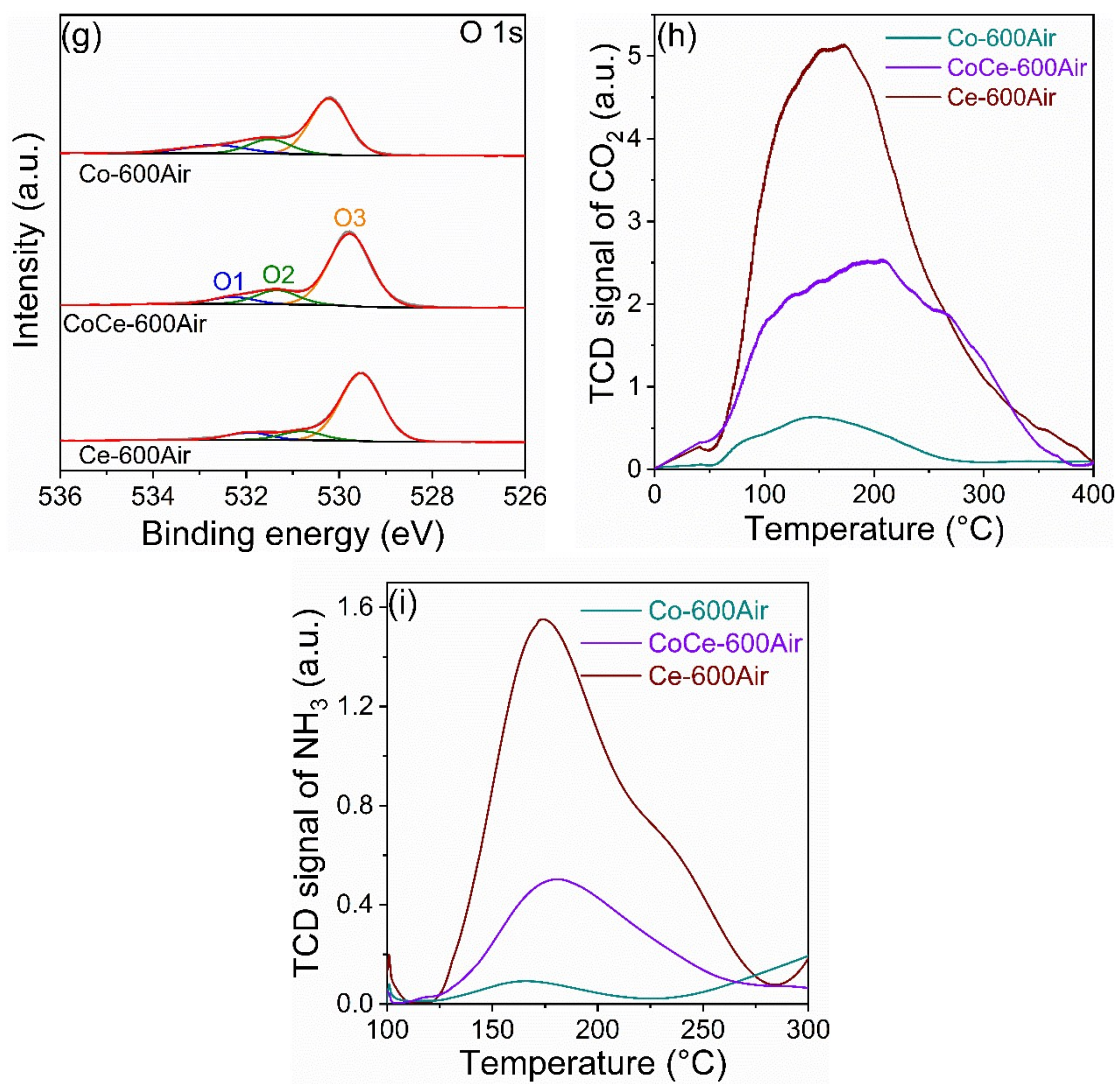

**Fig. S1.** Structural information of the samples prepared in air, including Co-600Air, CoCe-600Air, and Ce-600Air: (a) XRD patterns, (b) Raman spectra, (c) N<sub>2</sub> adsorption-desorption isotherms, (d) Pore size distributions, (e) XPS spectra of Co 2p, (f) XPS spectra of Ce 3d, (g) XPS spectra of O 1s, (h) CO<sub>2</sub>-TPD curves, and (i) NH<sub>3</sub>-TPD curves.

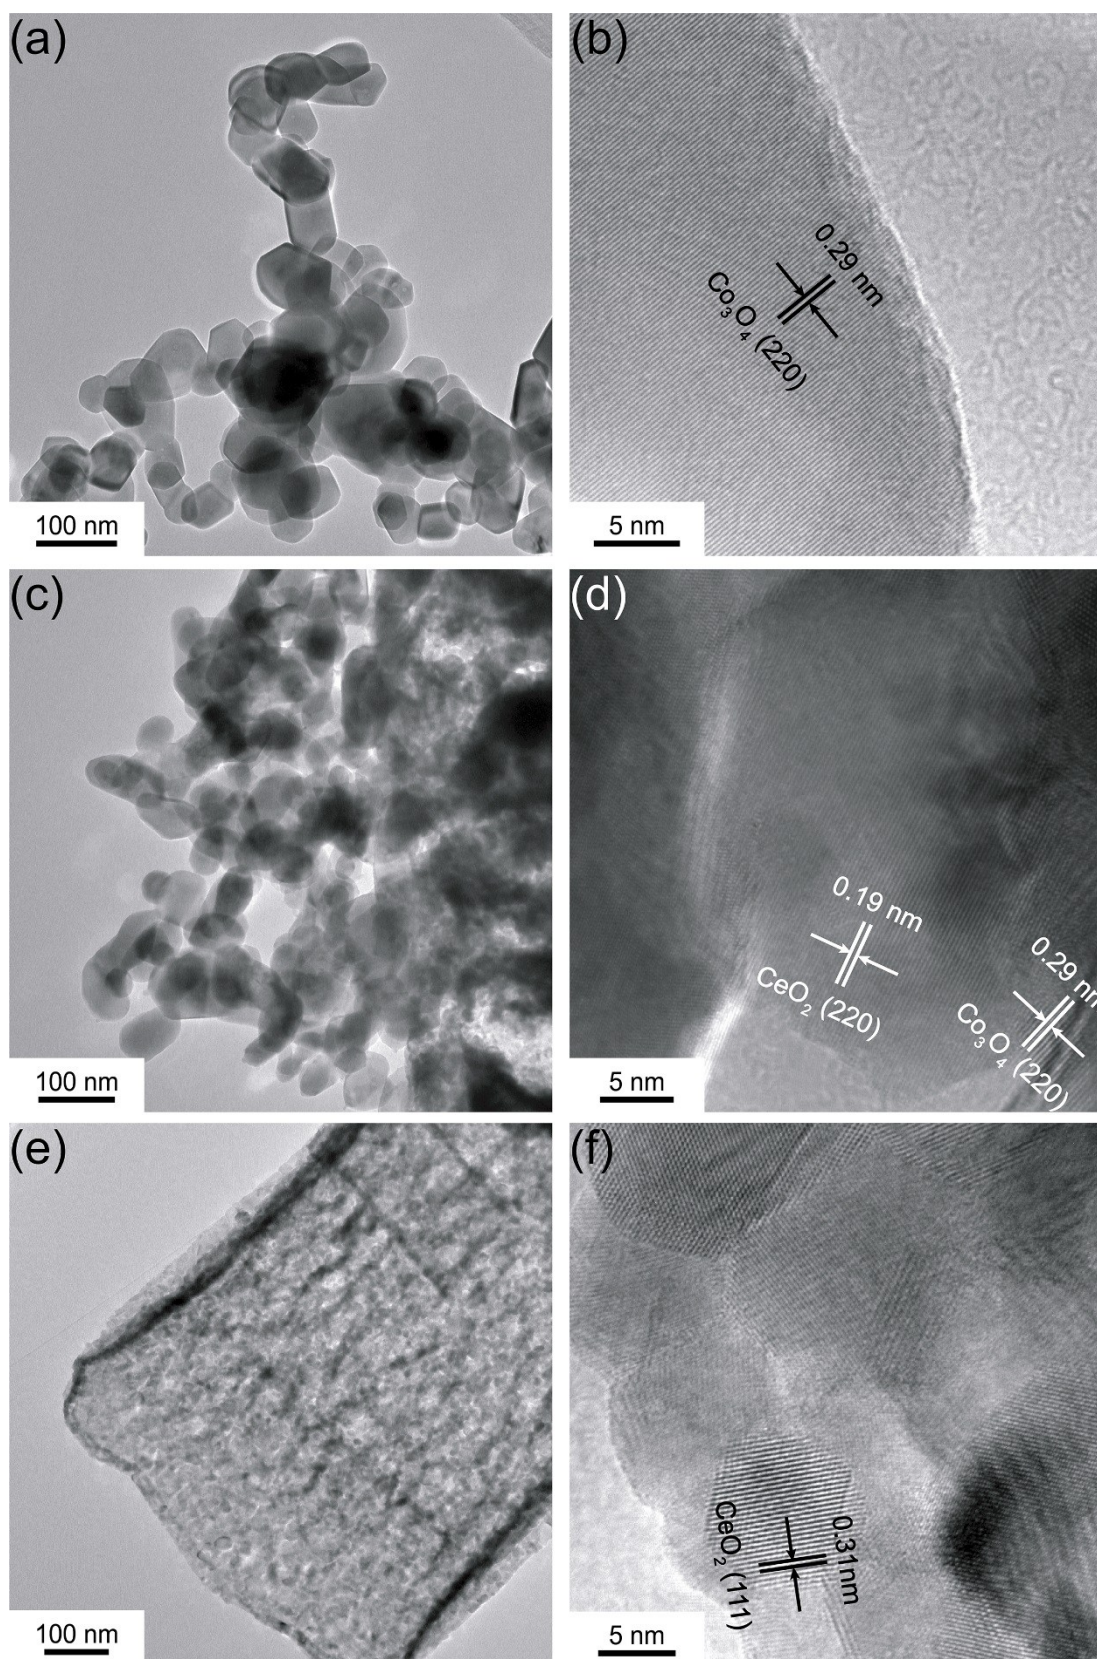

**Fig. S2.** TEM and HRTEM images: (a) and (b) Co-600Air; (c) and (d) CoCe-600Air; (e) and (f) Ce-600Air.

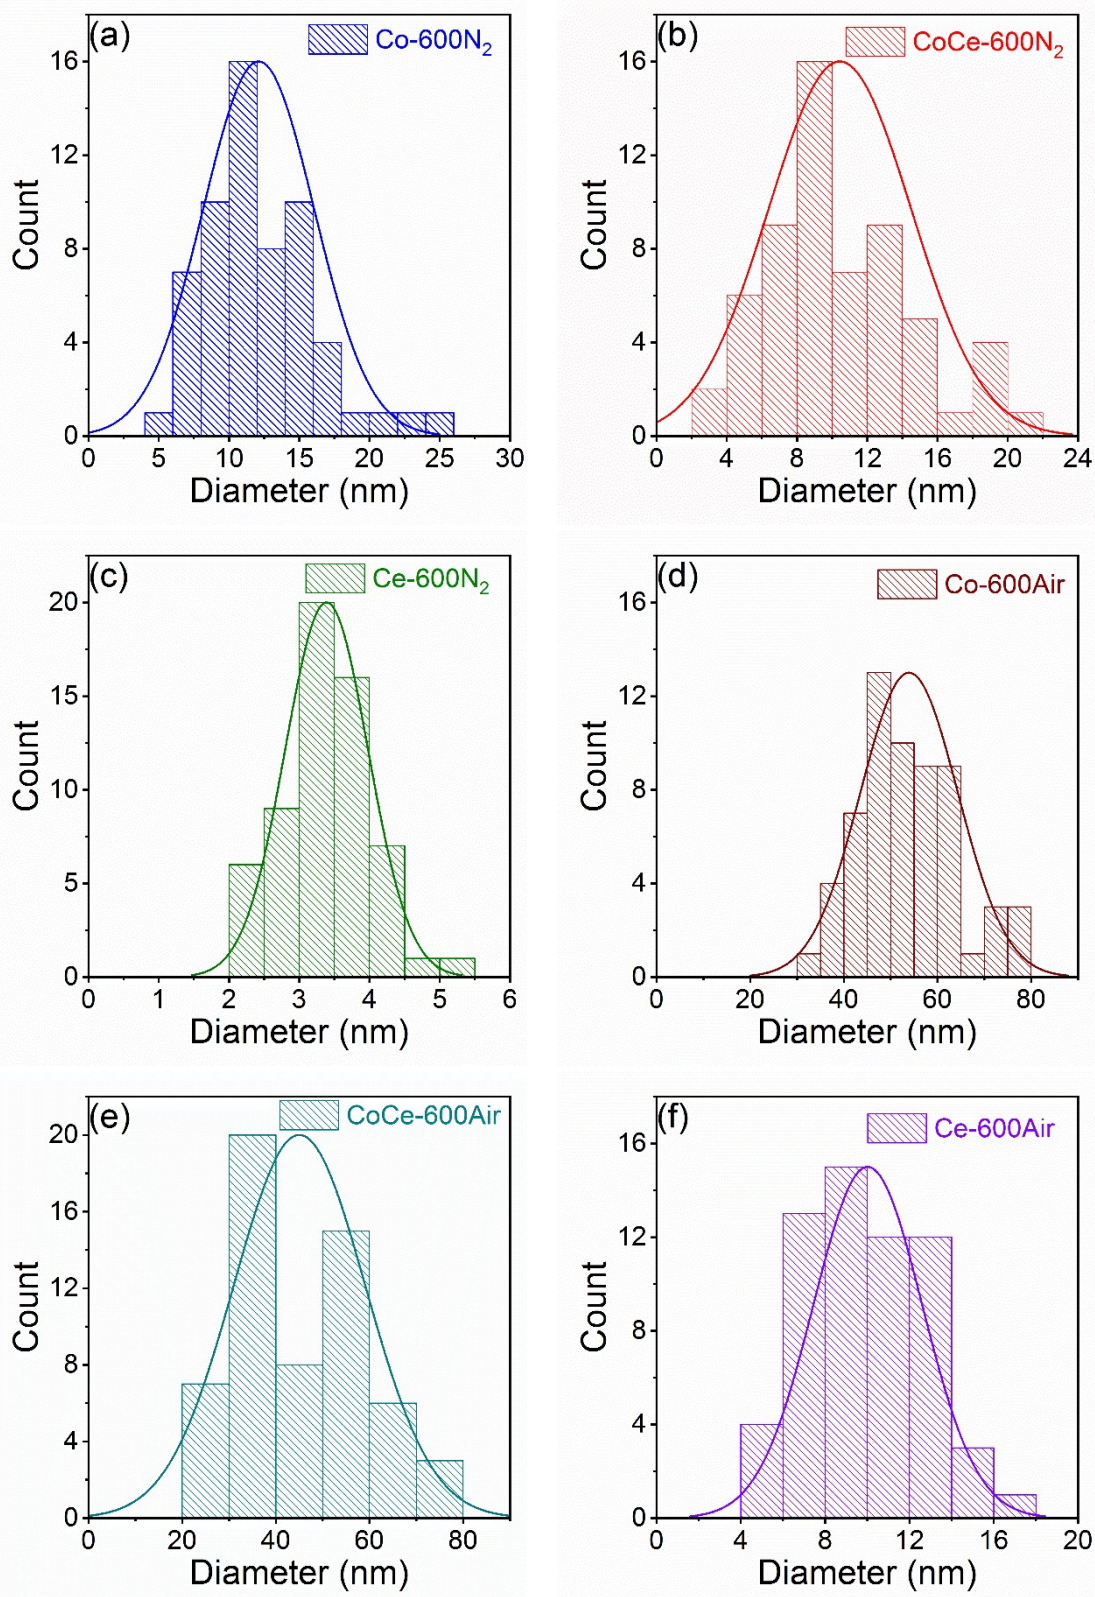

**Fig. S3.** Size distribution of nanoparticles of the resulting electrocatalysts. (a) Co-600N<sub>2</sub>. (b) CoCe-600N<sub>2</sub>. (c) Ce-600N<sub>2</sub>. (d) Co-600Air. (e) CoCe-600Air (f) Ce-600Air.

**Note S1.** Structural characterizations of the samples prepared in air, including Co-600Air, CoCe-600Air and Ce-600Air.

Fig. S1a shows the XRD patterns of Co-600Air, CoCe-600Air and Ce-600Air. The diffraction peaks show that Co-600Air and Ce-600Air contain  $\text{Co}_3\text{O}_4$  (PDF<sub>2</sub>65-3103) and  $\text{CeO}_2$  (PDF<sub>2</sub>34-0394), respectively. The CoCe-600Air includes both  $\text{Co}_3\text{O}_4$  and  $\text{CeO}_2$ . Fig. S1b show the Raman spectra of the samples prepared in air. Both Co-600Air and CoCe-600Air show four distinct peaks at  $466\text{ cm}^{-1}$ ,  $\sim 510\text{ cm}^{-1}$ ,  $\sim 608\text{ cm}^{-1}$  and  $\sim 670\text{ cm}^{-1}$  correspond to the  $E_g$ ,  $F_{2g}^1$ ,  $F_{2g}^2$  and  $A_g^1$  bands for  $\text{Co}_3\text{O}_4$ , respectively. Ce-600Air shows the single  $F_{2g}$  peak for  $\text{CeO}_2$  at  $464\text{ cm}^{-1}$ . Notably, the peak around  $466\text{ cm}^{-1}$  in CoCe-600Air can be assigned to the combined contributions from the  $F_{2g}$  for  $\text{CeO}_2$  and the  $E_g$  for  $\text{Co}_3\text{O}_4$ . The  $\text{N}_2$  adsorption-desorption isotherms of Co-600Air, CoCe-600Air and Ce-600Air are shown in Fig. S1c. The solid and hollow marks represent the adsorption and desorption branches, respectively. The typical H3-typed hysteresis loops were observed, suggesting mesopores in these electrocatalysts. Fig. S1d shows the pore size distributions of the samples. The average pore sizes of mesopores are  $\sim 2.05\text{ nm}$ ,  $\sim 2.04\text{ nm}$  and  $\sim 2.22\text{ nm}$  for Co-600Air, CoCe-600Air and Ce-600Air, respectively. The BET specific surface areas (SSAs) of Co-600Air, CoCe-600Air and Ce-600Air are  $\sim 15.1\text{ m}^2\text{ g}^{-1}$ ,  $\sim 31.5\text{ m}^2\text{ g}^{-1}$  and  $\sim 54.8\text{ m}^2\text{ g}^{-1}$ , respectively. The pore volumes of Co-600Air, CoCe-600Air and Ce-600Air are  $\sim 0.03\text{ cm}^3\text{ g}^{-1}$ ,  $\sim 0.07\text{ cm}^3\text{ g}^{-1}$  and  $\sim 0.18\text{ cm}^3\text{ g}^{-1}$ , respectively. The relevant parameters of the pores in them are summarized in Table S1. The Co 2p, Ce3d and O 1s XPS spectra of the samples prepared in air are shown in Fig. S1e-1g and Table S2. The binding energies of  $\text{Co}^{2+}$

and  $\text{Co}^{3+}$  of  $\text{Co } 2p_{3/2}$  in CoCe-600Air have some shifts toward the lower binding energy relative to Co-600Air. The binding energy of Ce species ( $\text{Ce}^{4+}$  and  $\text{Ce}^{3+}$ ) in CoCe-600Air is slightly shifted toward the higher binding energy. The binding energies of O1, O2 and O3 in CoCe-600Air show some shifts toward the higher binding energy compared to Ce-600Air, but still lower than those in Co-600Air.  $\text{CO}_2$ -TPD results (Fig. S1h) show the  $\text{CO}_2$  desorption peaks of Co-600Air, CoCe-600Air and Ce-600Air centers at  $\sim 146.2$  °C,  $\sim 206.9$  °C and  $\sim 173.4$  °C, respectively. The calculated basicity amounts of Co-600Air, CoCe-600Air and Ce-600Air are  $\sim 0.03$  mmol  $\text{g}^{-1}$ ,  $\sim 0.15$  mmol  $\text{g}^{-1}$  and  $\sim 0.25$  mmol  $\text{g}^{-1}$ , respectively.  $\text{NH}_3$ -TPD results (Fig. S1i) show the  $\text{NH}_3$  desorption peaks of Co-600Air, CoCe-600Air and Ce-600Air centers at  $\sim 166.3$  °C,  $\sim 181.1$  °C and  $\sim 174.3$  °C, respectively. The calculated acidity amounts of Co-600Air, CoCe-600Air and Ce-600Air are  $\sim 0.04$  mmol  $\text{g}^{-1}$ ,  $\sim 0.39$  mmol  $\text{g}^{-1}$  and  $\sim 1.24$  mmol  $\text{g}^{-1}$ , respectively. Fig. S2 shows the TEM and HRTEM images for Co-600Air, CoCe-600Air and Ce-600Air. The TEM image of Co-600Air (Fig. S2a) exhibits the irregularly shaped nanoparticles. HRTEM image (Fig. S2b) shows the d-spacing value of  $\sim 0.29$  nm, corresponding to the (220) plane of  $\text{Co}_3\text{O}_4$ . In CoCe-600Air, the  $\text{CeO}_2/\text{Co}_3\text{O}_4$  hybrid nanostructures are observed in its TEM and HRTEM images (Fig. S2c and S2d). The d-spacing of  $\sim 0.19$  nm and  $\sim 0.29$  nm are assigned to the (220) plane of the fluorite-typed cubic  $\text{CeO}_2$  and the (220) plane of  $\text{Co}_3\text{O}_4$ , respectively. The TEM image of Ce-600Air (Fig. S2e) shows the sheet-like morphology, which is composed of abundant small  $\text{CeO}_2$  nanoparticles with non-uniformed sizes (Fig. S3). The HRTEM (Fig. S2f) shows d-spacing of  $\sim 0.31$  nm, corresponding to the (111) planes of  $\text{CeO}_2$ .



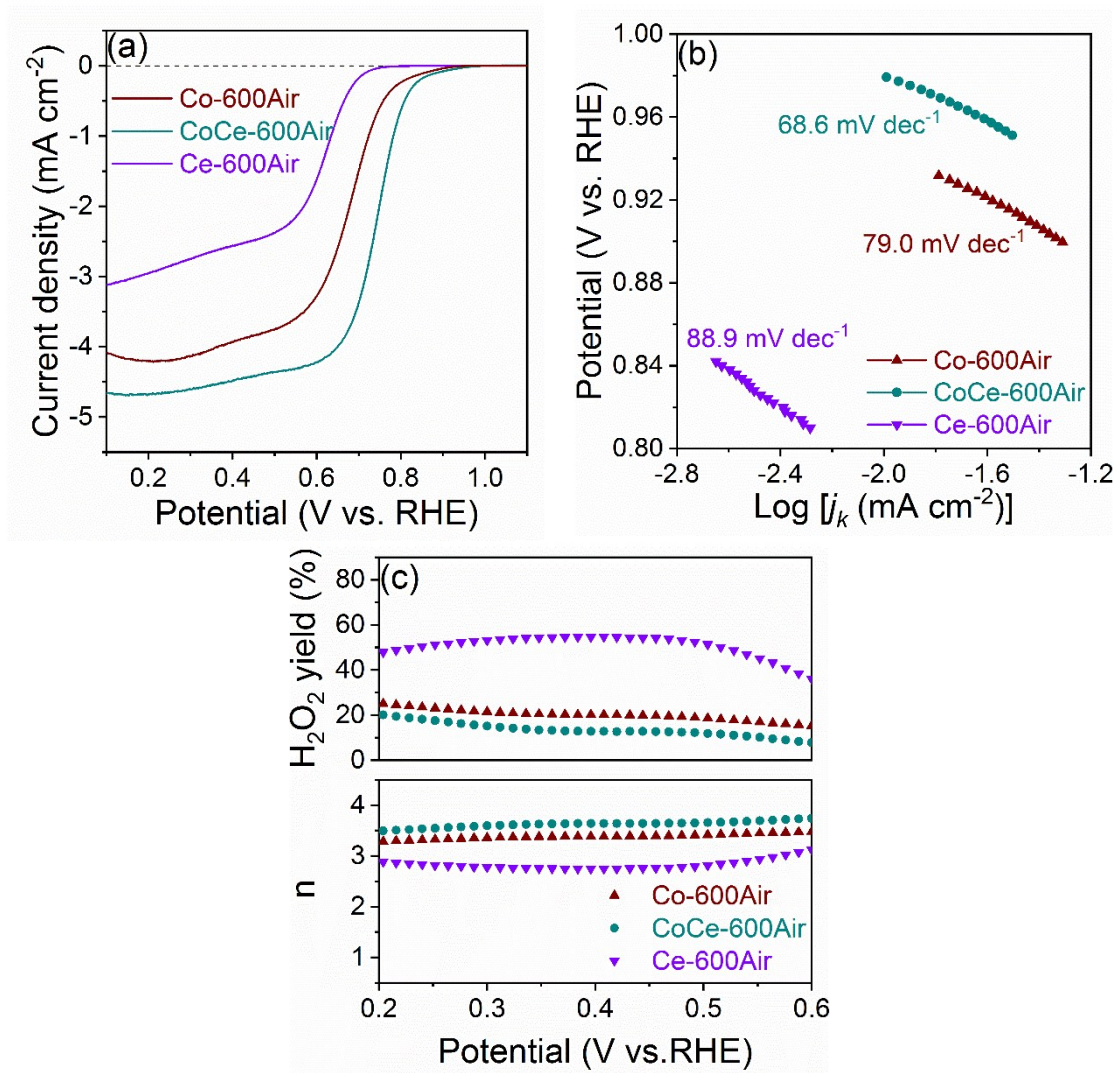

**Fig. S4.** The ORR and OER activity of Co-600Air, CoCe-600Air, and Ce-600Air: (a) ORR LSV curves at a scan rate of  $5 \text{ mV s}^{-1}$  under 1600 rpm. (b) The corresponding Tafel plots. (c) The electron transfer number ( $n$ ) and peroxide yield at various potentials.

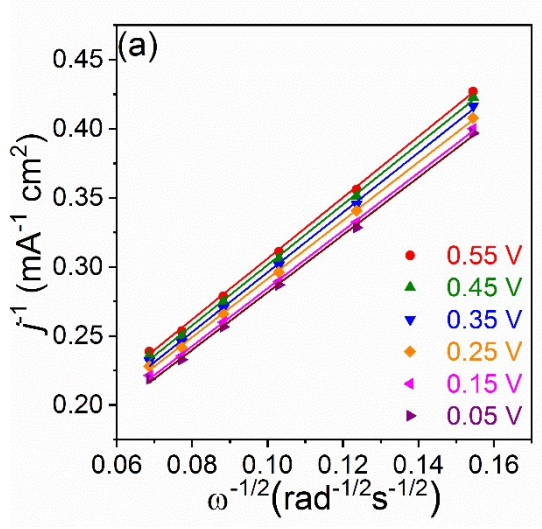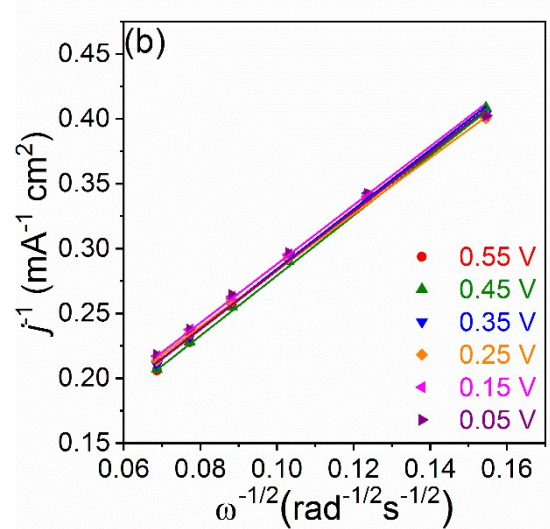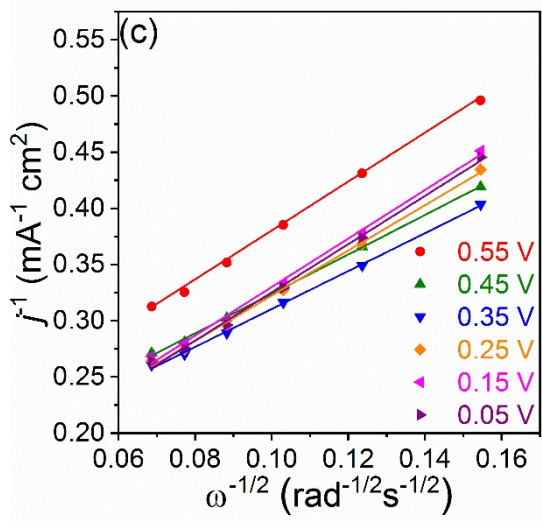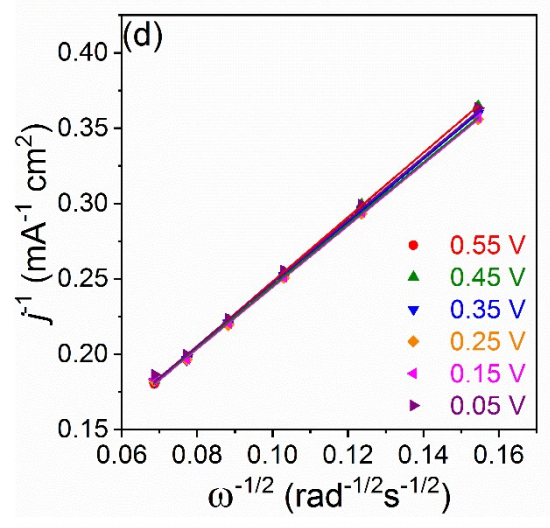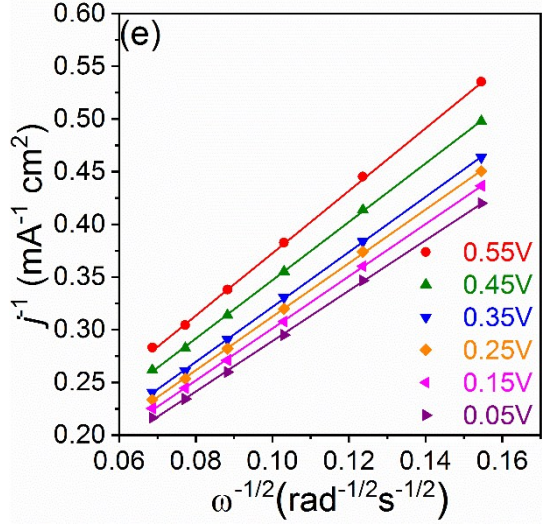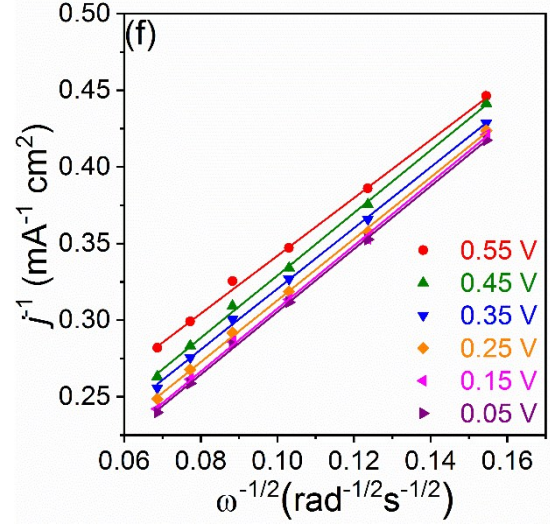

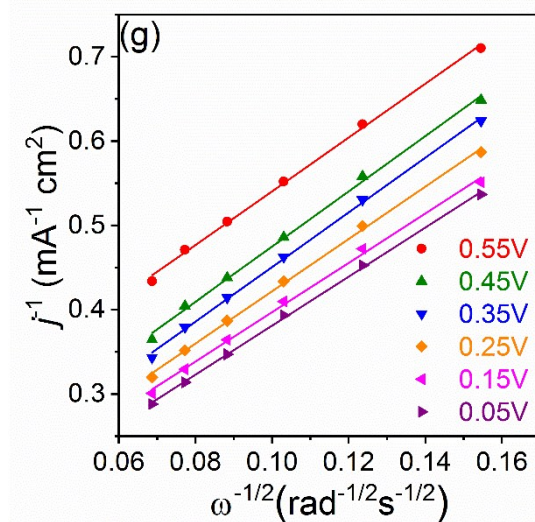

**Fig. S5.** K-L plots at different potentials of (a) Co-600N<sub>2</sub>, (b) CoCe-600N<sub>2</sub>, (c) Ce-600N<sub>2</sub>, (d) 20 wt% Pt/C, (e) Co-600Air, (f) CeCo-600Air and (g) Ce-600Air.

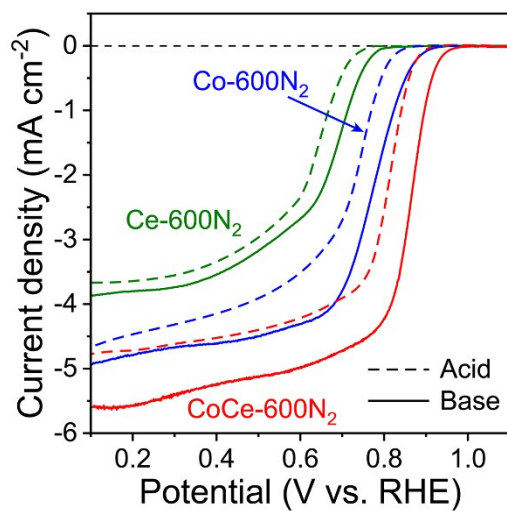

**Fig. S6.** ORR LSV curves at a scan rate of  $5 \text{ mV s}^{-1}$  under 1600 rpm in 0.1 M HClO<sub>4</sub> (dashed line) and 0.1 M KOH (solid line), respectively, for Co-600N<sub>2</sub>, Ce-600N<sub>2</sub> and CeCo-600N<sub>2</sub>.

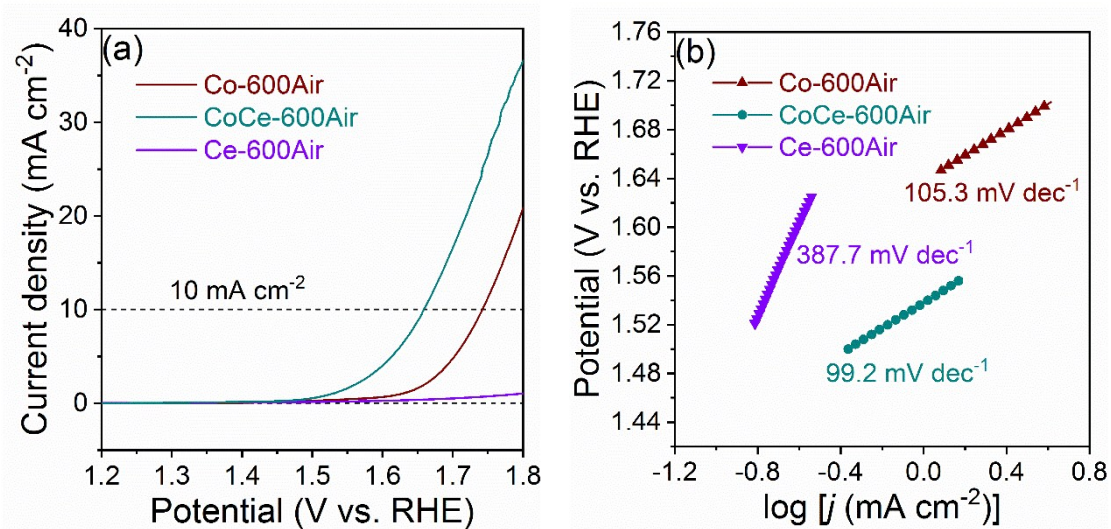

**Fig. S7.** (a) OER LSV curves at a scan rate of  $5 \text{ mV s}^{-1}$  under 1600 rpm. (b) The corresponding Tafel plots.

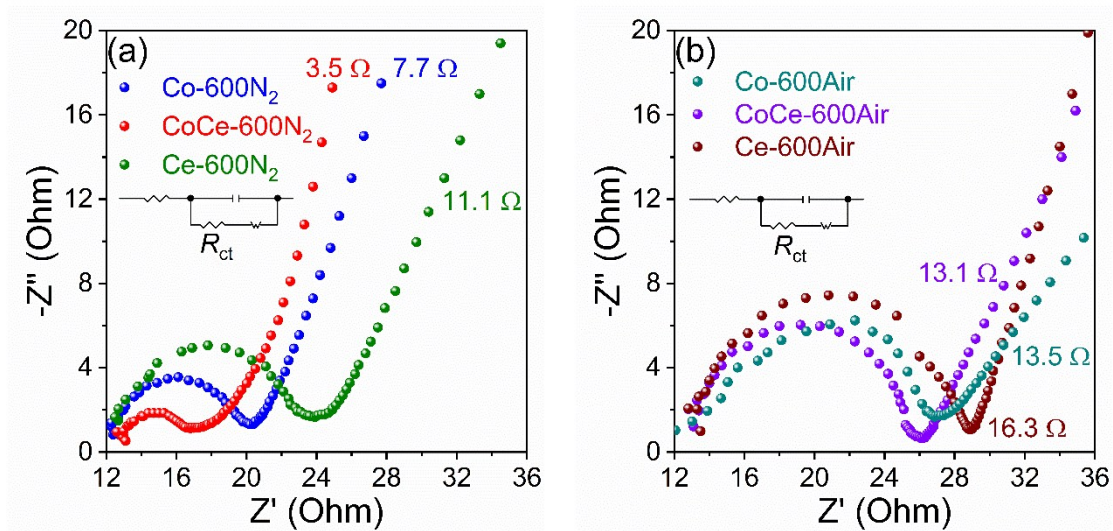

**Fig. S8.** EIS Nyquist plots at the open circuit potential and the simulated equivalent circuit (inset) for (a) Co-600 $N_2$ , Ce-600 $N_2$ , CeCo-600 $N_2$  and (b) Co-600Air, Ce-600Air, CeCo-600Air.

## Supplementary Tables

**Table S1.** Pore structures for the electrocatalysts prepared in N<sub>2</sub> and air.

| Samples                | BET SSA                           | Pore volume                        | Micropore | Mesopore |
|------------------------|-----------------------------------|------------------------------------|-----------|----------|
|                        |                                   |                                    | size      | size     |
|                        | (m <sup>2</sup> g <sup>-1</sup> ) | (cm <sup>3</sup> g <sup>-1</sup> ) | (nm)      | (nm)     |
| Co-600N <sub>2</sub>   | 165.4                             | 0.29                               | 0.41      | 2.39     |
| CoCe-600N <sub>2</sub> | 173.5                             | 0.22                               | 0.50      | 2.23     |
| Ce-600N <sub>2</sub>   | 287.1                             | 0.36                               | 0.45      | 2.56     |
| Co-600Air              | 15.1                              | 0.03                               | --        | 2.05     |
| CoCe-600Air            | 31.5                              | 0.07                               | --        | 2.04     |
| Ce-600Air              | 54.8                              | 0.18                               | --        | 2.22     |

**Table S2.** Binding energy of different species determined by XPS.

| Samples                 | N 1s      |          |           |          | Ce 3d <sub>5/2</sub> |                                                   | Co 2p <sub>3/2</sub> |                  |                  | O 1s  |       |       |
|-------------------------|-----------|----------|-----------|----------|----------------------|---------------------------------------------------|----------------------|------------------|------------------|-------|-------|-------|
|                         | Pyridinic | Pyrrolic | Quaternar | Oxidized | Ce <sup>3+</sup>     | Ce <sup>4+</sup>                                  | Co <sup>0</sup>      | Co <sup>2+</sup> | Co <sup>3+</sup> | O3    | O2    | O1    |
|                         | -N        | -N       | y<br>-N   | -N       |                      |                                                   |                      |                  |                  |       |       |       |
| Co-600N <sub>2</sub>    | 398.5     | 399.8    | 400.9     | --       | --                   | --                                                | 778.1                | 781.6            | 779.7            | 530.0 | 531.7 | 533.6 |
| CoCe-600 N <sub>2</sub> | 398.4     | 399.6    | 400.9     | 406.4    | 884.6, 903.1         | 882.3,<br>888.7, 898.2,<br>900.8,<br>907.7, 916.7 | --                   | 781.1            | 779.5            | 529.8 | 531.5 | 532.9 |
| Ce-600 N <sub>2</sub>   | 398.2     | 399.7    | 400.8     | 406.7    | 884.2, 902.9         | 882.1,<br>888.4,                                  | --                   | --               | --               | 529.7 | 531.4 | 532.8 |



|             |    |    |    |    |              |              |    |      |      |       |       |       |
|-------------|----|----|----|----|--------------|--------------|----|------|------|-------|-------|-------|
|             |    |    |    |    |              | 897.9,       |    |      |      |       |       |       |
|             |    |    |    |    |              | 900.6,       |    |      |      |       |       |       |
|             |    |    |    |    |              | 907.5, 916.5 |    |      |      |       |       |       |
| Co-600Air   | -- | -- | -- | -- | --           | --           | -- | 781. | 779. | 530.2 | 531.6 | 533.1 |
|             |    |    |    |    |              |              |    | 1    | 7    |       |       |       |
|             |    |    |    |    |              | 882.4,       |    |      |      |       |       |       |
|             |    |    |    |    |              | 889.2,       |    |      |      |       |       |       |
| CoCe-600Air | -- | -- | -- | -- | 884.8, 902.9 | 898.4,       | -- | 780. | 779. | 529.8 | 531.4 | 532.3 |
|             |    |    |    |    |              | 900.9,       |    | 9    | 5    |       |       |       |
|             |    |    |    |    |              | 907.8, 916.8 |    |      |      |       |       |       |
|             |    |    |    |    |              | 882.3,       |    |      |      |       |       |       |
| Ce-600Air   | -- | -- | -- | -- | 884.9, 903.0 | 889.0, 898.3 | -- | --   | --   | 529.6 | 530.8 | 532.0 |
|             |    |    |    |    |              | 990.8,       |    |      |      |       |       |       |

907.8, 916.7

---

**Table S3.** The surface compositions of the samples determined by XPS.

| Samples                    | N 1s (at. %)    |                |              |                | Tot<br>al<br>N | Ce 3d (at. %)         |                  |                 | Co <sup>0</sup> | Co 2p (at. %)    |                  |                   | Co <sup>2+</sup><br>Co <sup>3+</sup> | O 1s (at. %)    |     |     |      |
|----------------------------|-----------------|----------------|--------------|----------------|----------------|-----------------------|------------------|-----------------|-----------------|------------------|------------------|-------------------|--------------------------------------|-----------------|-----|-----|------|
|                            | Pyridinic<br>-N | Pyrrolic<br>-N | Quaternary-N | Oxidized<br>-N |                | Ce <sup>3+</sup><br>/ | Ce <sup>4+</sup> | Tota<br>l<br>Ce |                 | Co <sup>2+</sup> | Co <sup>3+</sup> | +Co <sup>3+</sup> |                                      | Tota<br>l<br>Co | O3  | O2  | O1   |
| Co-600N <sub>2</sub>       | 1.78            | 1.54           | 1.51         | --             | 4.8            | --                    | --               | --              | 0.5             | 0.93             | 1.03             | 1.96              | 2.49                                 | 1.0             | 3.4 | 1.2 | 5.65 |
| CoCe-<br>600N <sub>2</sub> | 1.79            | 1.63           | 2.07         | 2.10           | 7.5            | 0.42                  | 1.64             | 2.06            | --              | 5.88             | 5.72             | 11.6              | 11.6                                 | 19.79           | 9.1 | 5.0 | 34.0 |
| Ce-600N <sub>2</sub>       | 0.98            | 1.71           | 1.37         | 0.64           | 4.7            | 0.89                  | 4.62             | 5.51            | --              | --               | --               | --                | --                                   | 16.03           | 7.9 | 3.5 | 27.4 |
| Co-600Air                  | --              | --             | --           | --             | --             | --                    | --               | --              | --              | 5.72             | 5.25             | 10.9              | 10.9                                 | 20.7            | 5.3 | 4.9 | 30.9 |
|                            |                 |                |              |                |                |                       |                  |                 |                 |                  |                  | 7                 | 7                                    | 63              | 7   | 5   | 5    |

|           |    |    |    |    |    |      |      |      |    |      |      |      |      |     |     |     |      |
|-----------|----|----|----|----|----|------|------|------|----|------|------|------|------|-----|-----|-----|------|
| CoCe-     | -- | -- | -- | -- | -- | 1.18 | 4.23 | 5.41 | -- | 7.72 | 5.26 | 12.9 | 12.9 | 31. | 6.2 | 3.1 | 40.8 |
| 600Air    |    |    |    |    |    |      |      |      |    |      |      | 8    | 8    | 52  | 2   | 1   | 5    |
| Ce-600Air | -- | -- | -- | -- | -- | 2.46 | 11.5 | 13.9 | -- | --   | --   | --   | --   | 33. | 4.5 | 3.9 | 42.1 |
|           |    |    |    |    |    |      | 3    | 9    |    |      |      |      |      | 63  | 8   | 0   | 1    |

---

**Table S4.** Summary of ORR and OER activity of the samples prepared in air.

| Electrocatalysts | ORR activity        |                         |                                                 |                                                | OER activity                            |                                                       |                                                             |                                                | Overall evaluation                      |                                     |
|------------------|---------------------|-------------------------|-------------------------------------------------|------------------------------------------------|-----------------------------------------|-------------------------------------------------------|-------------------------------------------------------------|------------------------------------------------|-----------------------------------------|-------------------------------------|
|                  | Onset Potential (V) | Half-wave potential (V) | Limiting current Density (mA cm <sup>-2</sup> ) | Current density at 0.76 (mA cm <sup>-2</sup> ) | ORR Tafel Slope (mV dec <sup>-1</sup> ) | Potential @ 10 mA cm <sup>-2</sup> ( $E_{j=10}$ ) (V) | Overpotential @ 10 mA cm <sup>-2</sup> ( $\eta_{10}$ ) (mV) | Current density at overpotential of 470 mV (V) | OER Tafel Slope (mV dec <sup>-1</sup> ) | $\Delta E = E_{j=10} - E_{1/2}$ (V) |
| Co-600Air        | 0.90                | 0.68                    | 3.94                                            | 0.15                                           | 79.0                                    | 1.741                                                 | 511                                                         | 4.67                                           | 105.3                                   | 1.06                                |
| CoCe-600Air      | 0.92                | 0.74                    | 4.44                                            | 0.29                                           | 68.6                                    | 1.657                                                 | 427                                                         | 16.42                                          | 99.2                                    | 0.92                                |
| Ce-600Air        | 0.75                | 0.61                    | 2.82                                            | 0.01                                           | 88.9                                    | N.A                                                   | N.A                                                         | 0.52                                           | 387.7                                   | N.A                                 |

**Table S5.** Comparison of the bifunctional activity of the recently reported oxygen electrocatalysts.

| Electrocatalyst                                      | Electrolyte | $E_{1/2}$ (V)<br>vs. RHE | $E_{j=10}$ (V)<br>vs. RHE | $\Delta E$ (V)<br>( $E_{j=10}-E_{1/2}$ ) | Refs.     |
|------------------------------------------------------|-------------|--------------------------|---------------------------|------------------------------------------|-----------|
| CeO <sub>2</sub> /Co <sub>3</sub> O <sub>4</sub> @NC | 0.1 M KOH   | 0.87                     | 1.51                      | 0.64                                     | This work |
| Co-N@HCS                                             | 0.1 M KOH   | 0.86                     | 1.72                      | 0.86                                     | S1        |
| 3D NCNT array                                        | 0.1 M KOH   | 0.81                     | 1.65                      | 0.84                                     | S2        |
| Pd@PdO-Co <sub>3</sub> O <sub>4</sub>                | 0.1 M KOH   | 0.73                     | 1.54                      | 0.81                                     | S3        |
| RuO <sub>2</sub>                                     | 0.1 M KOH   | 0.37                     | 1.64                      | 1.27                                     | S4        |
| Pt/C                                                 | 0.1 M KOH   | 0.90                     | 1.90                      | 1.00                                     | S4        |
| Co@Co <sub>3</sub> O <sub>4</sub> /NC-1              | 0.1 M KOH   | 0.80                     | 1.65                      | 0.85                                     | S4        |
| CoO/N-graphene                                       | 1 M KOH     | 0.81                     | 1.57                      | 0.76                                     | S5        |
| NC@Co-NGC<br>DSNCs                                   | 0.1 M KOH   | 0.82                     | 1.64                      | 0.82                                     | S6        |
| Co-CoO-<br>Co <sub>3</sub> O <sub>4</sub> /NC        | 0.1 M KOH   | 0.80                     | 1.63                      | 0.83                                     | S7        |

**Table S6.** ORR and OER mass activity of the resulting electrocatalysts prepared in air.

| Electrocatalysts | ORR mass activity ( $A\ g_{cat}^{-1}$ ) <sup>a)</sup> | OER mass activity ( $A\ g_{cat}^{-1}$ ) <sup>b)</sup> |
|------------------|-------------------------------------------------------|-------------------------------------------------------|
| Co-600Air        | 0.63                                                  | 19.46                                                 |
| CoCe-600Air      | 1.21                                                  | 68.42                                                 |
| Ce-600Air        | 0.04                                                  | 2.17                                                  |

<sup>a)</sup> The ORR mass activity was obtained through normalization of kinetic current density at 0.76 V to the mass loading of the resulting electrocatalysts on the GC electrode. <sup>b)</sup> The OER mass activity was obtained by normalization of current density at the overpotential of 470 mV to the loading mass of the resulting electrocatalysts on the GC electrode.

**Table S7.** Comparisons of the performance of Zn-air batteries with recently reported bifunctional electrocatalysts.

| Electrocatalyst                                      | Electrolyte                            | Specific capacity (mAh g <sub>Zn</sub> <sup>-1</sup> ) | Energy density (Wh kg <sub>Zn</sub> <sup>-1</sup> ) | Cycle Condition (mA cm <sup>-2</sup> ) | Refs.     |
|------------------------------------------------------|----------------------------------------|--------------------------------------------------------|-----------------------------------------------------|----------------------------------------|-----------|
| CeO <sub>2</sub> /Co <sub>3</sub> O <sub>4</sub> @NC | 6.0 M KOH + 0.10 M ZnCl <sub>2</sub>   | 643                                                    | 805                                                 | 5                                      | This work |
| NGM-Co                                               | 6.0 M KOH + 0.20 M ZnCl <sub>2</sub>   | 750                                                    | 840                                                 | 2                                      | S8        |
| NPMC-1000                                            | 6.0 M KOH                              | 735                                                    | 835                                                 | 2                                      | S9        |
| CoNi@NCNT/NF                                         | 6.0 M KOH + 0.20 M Zn(Ac) <sub>2</sub> | 655                                                    | 845                                                 | 5                                      | S10       |
| Co@Co <sub>3</sub> O <sub>4</sub> @NC-900            | 6.0 M KOH                              | 640                                                    | --                                                  | 5                                      | S11       |
| Mo-N/C@MoS <sub>2</sub>                              | 6.0 M KOH + 0.20 M Zn(Ac) <sub>2</sub> | --                                                     | 846.07                                              | 5                                      | S12       |
| CNT/graphene                                         | 6.0 M KOH                              | 712                                                    | 872                                                 | 5                                      | S13       |
| Porous C fiber film                                  | 6.0 M KOH + 0.20 M Zn(Ac) <sub>2</sub> | 660                                                    | 838                                                 | 5                                      | S14       |
| Co <sub>3</sub> O <sub>4</sub> /N-rGO                | 6.0 M KOH + 0.20 M ZnCl <sub>2</sub>   | 550                                                    | 649                                                 | 6                                      | S15       |



|                                          |                                           |       |       |    |     |
|------------------------------------------|-------------------------------------------|-------|-------|----|-----|
| NCNF/Co <sub>x</sub> Mn <sub>1-x</sub> O | 6.0 M KOH + 0.20<br>M ZnCl <sub>2</sub>   | 581   | 695   | 7  | S16 |
| NCNT/CoO-<br>NiONiCo                     | 6.0 M KOH + 0.20<br>M ZnCl <sub>2</sub>   | 594   | 713   | 7  | S17 |
| NCNF/Co <sub>x</sub> Mn <sub>1-x</sub> O | 6.0 M KOH + 0.20<br>M ZnCl <sub>2</sub>   | 581   | 695   | 7  | S16 |
| NCNT/CoO-<br>NiONiCo                     | 6.0 M KOH + 0.20<br>M ZnCl <sub>2</sub>   | 594   | 713   | 7  | S17 |
| NCNF                                     | 6.0 M KOH + 0.20<br>M ZnCl <sub>2</sub>   | 626   | 776   | 10 | S14 |
| Porous C fiber film                      | 6.0 M KOH + 0.20<br>M Zn(Ac) <sub>2</sub> | 626   | 776   | 10 | S14 |
| CoZn-NC-700                              | 6.0 M KOH + 0.10<br>M ZnCl <sub>2</sub>   | 578   | 694   | 10 | S18 |
| Ni <sub>3</sub> Fe/N-C                   | 6.0 M KOH + 0.20<br>M ZnCl <sub>2</sub>   | 528   | 634   | 10 | S19 |
| NiCo <sub>2</sub> S <sub>4</sub> /N-CNT  | 6.0 M KOH + 0.20<br>M ZnCl <sub>2</sub>   | 431.1 | 554.6 | 10 | S20 |
| BHPC-950                                 | 6.0 M KOH                                 | 797   | 963   | 20 | S21 |
| NCO-A1                                   | 6.0 M KOH                                 | 580   | --    | 20 | S22 |
| Ag-Cu on Ni foam                         | 6.0 M KOH + 0.20<br>M ZnCl <sub>2</sub>   | 572   | 641   | 20 | S23 |

|                |                     |       |       |    |     |
|----------------|---------------------|-------|-------|----|-----|
| CoO/N-CNT+NiFe | 6.0 M KOH + 0.20    | 570   | 700   | 20 | S24 |
| LDH            | M ZnCl <sub>2</sub> |       |       |    |     |
| CoO NRs        | 6.0 M KOH           | 541.3 | 583.3 | 20 | S25 |
| NCNT/CoO-      | 6.0 M KOH + 0.20    | 545   | 615   | 20 | S17 |
| NiONiCo        | M ZnCl <sub>2</sub> |       |       |    |     |

---

## Supplementary References

- S1. S. C. Cai, Z. H. Meng, H. L. Tang, Y. Wang and P. Tsiakaras, *Appl. Catal., B*, 2017, **217**, 477-484.
- S2. Z. H. Li, M. F. Shao, Q. H. Yang, Y. Tang, M. Wei, D. G. Evans and X. Duan, *Nano Energy*, 2017, **37**, 98-107.
- S3. H. C. Li, Y. J. Zhang, X. Hu, W. J. Liu, J. J. Chen and H. Q. Yu, *Adv. Energy Mater.*, 2018, **8**, 1702734.
- S4. A. Aijaz, J. Masa, C. Rösler, W. Xia, P. Weide, A. J. Botz, R. A. Fischer, W. Schuhmann and M. Muhler, *Angew. Chem. Int. Ed.*, 2016, **55**, 4087-4091.
- S5. S. Mao, Z. Wen, T. Huang, Y. Hou and J. Chen, *Energy Environ. Sci.*, 2014, **7**, 609-616.
- S6. S. Liu, Z. Wang, S. Zhou, F. Yu, M. Yu, C. Y. Chiang, W. Zhou, J. Zhao and J. Qiu, *Adv. Mater.*, 2017, **29**, 1700874.
- S7. X. R. Yi, X. B. He, F. X. Yin, B. H. Chen, G. R. Li and H. Q. Yin, *Electrochim. Acta*, 2019, **295**, 966-977.
- S8. C. Tang, B. Wang, H. F. Wang and Q. Zhang, *Adv. Mater.*, 2017, **29**, 1703185.
- S9. J. Zhang, Z. Zhao, Z. Xia and L. Dai, *Nat. Nanotechnol.*, 2015, **10**, 444-452.
- S10. W. Niu, S. Pakhira, K. Marcus, Z. Li, J. L. Mendoza-Cortes and Y. Yang, *Adv. Energy Mater.*, 2018, **8**, 1800480.
- S11. Z. Guo, F. Wang, Y. Xia, J. Li, A. G. Tamirat, Y. Liu, L. Wang, Y. Wang and Y. Xia, *J. Mater. Chem. A*, 2018, **6**, 1443-1453.
- S12. I. S. Amiin, Z. Pu, X. Liu, K. A. Owusu, H. G. R. Monestel, F. O. Boakye, H.

- Zhang and S. Mu, *Adv. Funct. Mater.*, 2017, **27**, 1702300.
- S13. J. Yang, H. Sun, H. Liang, H. Ji, L. Song, C. Gao and H. Xu, *Adv. Mater.*, 2016, **28**, 4606-4613.
- S14. Q. Liu, Y. Wang, L. Dai and J. Yao, *Adv. Mater.*, 2016, **28**, 3000-3006.
- S15. Y. Li, C. Zhong, J. Liu, X. Zeng, S. Qu, X. Han, Y. Deng, W. Hu and J. Lu, *Adv. Mater.*, 2018, **30**, 1703657.
- S16. X. Liu, M. Park, M. G. Kim, S. Gupta, X. Wang, G. Wu and J. Cho, *Nano Energy*, 2016, **20**, 315-325.
- S17. X. Liu, M. Park, M. G. Kim, S. Gupta, G. Wu and J. Cho, *Angew. Chem. Int. Ed.*, 2015, **54**, 9654-9658.
- S18. B. Chen, X. He, F. Yin, H. Wang, D.-J. Liu, R. Shi, J. Chen and H. Yin, *Adv. Funct. Mater.*, 2017, **27**, 1700795.
- S19. G. Fu, Z. Cui, Y. Chen, Y. Li, Y. Tang and J. B. Goodenough, *Adv. Energy Mater.*, 2017, **7**, 1601172.
- S20. X. Han, X. Wu, C. Zhong, Y. Deng, N. Zhao and W. Hu, *Nano Energy*, 2017, **31**, 541-550.
- S21. M. Yang, X. Hu, Z. Fang, L. Sun, Z. Yuan, S. Wang, W. Hong, X. Chen and D. Yu, *Adv. Funct. Mater.*, 2017, **27**, 1701971.
- S22. M. Prabu, K. Ketpang and S. Shanmugam, *Nanoscale*, 2014, **6**, 3173-3181.
- S23. Y. Jin and F. Chen, *Electrochim. Acta*, 2015, **158**, 437-445.
- S24. Y. Li, M. Gong, Y. Liang, J. Feng, J. E. Kim, H. Wang, G. Hong, B. Zhang and H. Dai, *Nat. Commun.*, 2013, **4**, 1805.

- S25. P. Da, M. Wu, K. Qiu, D. Yan, Y. Li, J. Mao, C. Dong, T. Ling and S. Qiao,  
*Chem. Eng. Sci.*, 2019, **194**, 127-133.
